# Supplementary material for: Retrospective review of metastatic melanoma patients with leptomeningeal disease treated with intrathecal interleukin-2
Source: PubMed Central journal article supplement — ESMO Open. 2018 Jan 24;3(1):e000283. doi: 10.1136/esmoopen-2017-000283 (PMC5786950; doi:10.1136/esmoopen-2017-000283), 2018-01-24
Supplement: esmoopen-2017-000283supp001.pdf [file esmoopen-2017-000283supp001.pdf]

## Supplementary Material

S 1: Response evaluation in patients with LMD at baseline

| Variable                                                                               | Category             | N (%)    |
|----------------------------------------------------------------------------------------|----------------------|----------|
| Radiographic Response in Patients with Evidence of LMD of the Brain at Baseline (N=23) | Improved/Response    | 9 (39%)  |
|                                                                                        | Progressed           | 10 (43%) |
|                                                                                        | No FU Data Available | 3 (13%)  |
|                                                                                        | Stable               | 1 (4%)   |
| Radiographic Response in Patients with Evidence of LMD of the Spine at Baseline (N=19) | Improved/Response    | 6 (32%)  |
|                                                                                        | Progressed           | 6 (32%)  |
|                                                                                        | No FU Data Available | 5 (26%)  |
|                                                                                        | Stable               | 2 (11%)  |

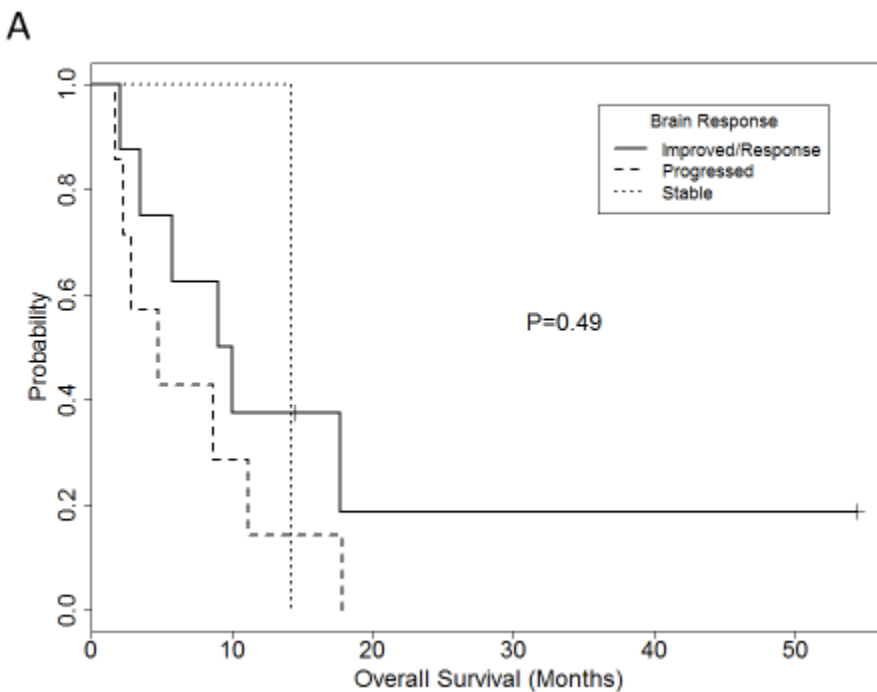

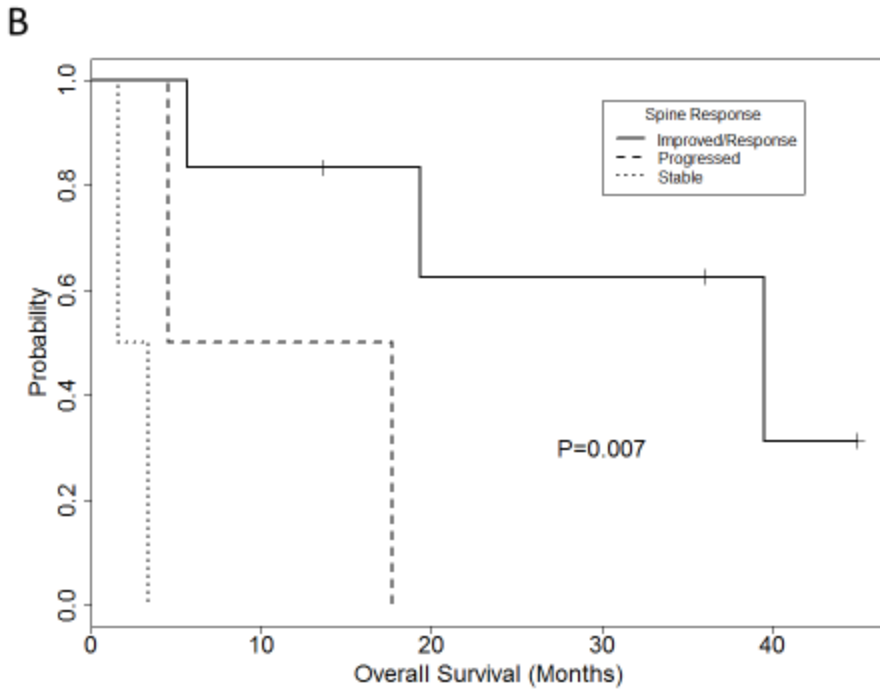

Figure S 1. Overall survival by radiographic response. Overall survival from the date of radiographic response evaluation was determined by Kaplan-Meier analysis. The figures show OS by radiographic response for patients with evidence of LMD in the brain (A,  $N=23$  patients) and the spine (B,  $N=19$  patients). Solid line, radiographic improvement/response; broken line, disease progression; dotted line, stable disease
